# Supplementary material for: First Genome Description of Providencia vermicola Isolate Bearing NDM-1 from Blood Culture
Source: MDPI journal article supplement (doi:10.3390/microorganisms9081751), 2021-08-17
Supplement: s1 [file s1]

**Supplementary Table S1:** BlastP comparison of the Siderophore biosynthesis NRPS cluster of *P. vermicola* P8538 with that of *P. stuartii*, *M. morganii*, and *Salmonella enterica*.

| <i>P. vermicola</i><br>P8538 | Size<br>(aa) | %GC<br>content | Predicted functions                                                       | <i>Providencia stuartii</i><br>PRV00010 |           | <i>Morganella morganii</i><br>VGH116 |           | <i>Salmonella enterica</i><br>2014AM-3158 |           |
|------------------------------|--------------|----------------|---------------------------------------------------------------------------|-----------------------------------------|-----------|--------------------------------------|-----------|-------------------------------------------|-----------|
|                              |              |                |                                                                           | %aa identity                            | E-value   | %aa identity                         | E-value   | %aa identity                              | E-value   |
| ORF1                         | 106          | 32.09          | Helix-turn-helix transcriptional regulator                                | 100                                     | 1.09e-77  | 0                                    | -         | 0                                         | -         |
| ORF2                         | 207          | 40.22          | Fimbrial protein                                                          | 100                                     | 2.02e-126 | 0                                    | -         | 0                                         | -         |
| ORF3                         | 227          | 33.63          | Hypothetical protein                                                      | 99                                      | 3.24e-142 | 0                                    | -         | 0                                         | -         |
| ORF4                         | 831          | 36.14          | CS1-pili formation C-terminal domain-protein                              | 100                                     | 0.0       | 0                                    | -         | 0                                         | -         |
| ORF5                         | 515          | 35.98          | CFA/I fimbrial minor adhesin                                              | 100                                     | 0.0       | 0                                    | -         | 0                                         | -         |
| ORF6                         | 213          | 32.24          | Fimbrial protein                                                          | 100                                     | 1.07e-159 | 0                                    | -         | 0                                         | -         |
| ORF7                         | 246          | 40.76          | Glycerophosphodiester phosphodiesterase                                   | 100                                     | 3.55e-162 | 0                                    | -         | 0                                         | -         |
| ORF8                         | 239          | 33.19          | 4'-phosphopantetheinyl transferase entD                                   | 100                                     | 2.22e-173 | 46                                   | 5.67e-75  | 0                                         | -         |
| ORF9                         | 673          | 36.75          | TonB-dependent receptor                                                   | 100                                     | 0.0       | 72                                   | 0.0       | 69                                        | 0.0       |
| ORF10                        | 1498         | 30.11          | Amino acid adenylation domain-protein                                     | 99                                      | 0.0       | 52                                   | 0.0       | 52                                        | 0.0       |
| ORF11                        | 2628         | 30.25          | Siderophore biosynthesis NRPS modules<br>(AMP-binding protein)            | 99                                      | 0.0       | 56                                   | 0.0       | 56                                        | 0.0       |
| ORF12                        | 1008         | 35.81          | Acyltransferase domain-containing protein<br>(Type I polyketide synthase) | 100                                     | 0.0       | 64                                   | 0.0       | 64                                        | 0.0       |
| ORF13                        | 73           | 26.58          | Acyl carrier protein                                                      | 100                                     | 8.51e-50  | 64                                   | 1.51e-27  | 60                                        | 4.34e-27  |
| ORF14                        | 530          | 30.13          | 2,3-dihydroxybenzoyl)adenylate synthase<br>(AMP-binding protein)          | 98                                      | 0.0       | 65                                   | 0.0       | 66                                        | 0.0       |
| ORF15                        | 414          | 28.51          | Non-ribosomal peptide synthetase                                          | 99                                      | 0.0       | 54                                   | 4.69e-166 | 53                                        | 2.66e-164 |
| ORF16                        | 1438         | 30.14          | Thioester reductase domain-containing protein<br>(AMP-binding protein)    | 99                                      | 0.0       | 58                                   | 0.0       | 58                                        | 0.0       |
| ORF17                        | 257          | 33.33          | Thioesterase                                                              | 99                                      | 0.0       | 66                                   | 5.81e-120 | 66                                        | 3.00e-125 |
| ORF18                        | 585          | 32.37          | ABC transporter ATP-binding protein                                       | 100                                     | 0.0       | 77                                   | 0.0       | 77                                        | 0.0       |
| ORF19                        | 585          | 34.19          | ABC transporter ATP-binding protein                                       | 100                                     | 0.0       | 79                                   | 0.0       | 80                                        | 0.0       |
| ORF20                        | 415          | 33.17          | Tetracycline resistance MFS efflux pump                                   | 99                                      | 0.0       | 79                                   | 0.0       | 79                                        | 0.0       |
| ORF21                        | 403          | 32.43          | MFS transporter                                                           | 100                                     | 0.0       | 74                                   | 0.0       | 72                                        | 1.06e-147 |
| ORF22                        | 497          | 33.53          | Aminotransferase class V-fold PLP-dependent enzyme                        | 100                                     | 0.0       | 68                                   | 0.0       |                                           |           |
| ORF23                        | 449          | 34.15          | Aromatic acid/H <sup>+</sup> symport family MFS transporter               | 98                                      | 0.0       | 62                                   | 8.32e-158 | 29                                        | 3.40e-05  |

|       |     |       |                                                 |     |           |    |           |   |   |
|-------|-----|-------|-------------------------------------------------|-----|-----------|----|-----------|---|---|
| ORF24 | 247 | 43.28 | 2,3-dihydro-2,3-dihydroxybenzoate dehydrogenase | 99  | 0.0       | 55 | 1.75e-94  | 0 | - |
| ORF25 | 218 | 43.38 | Isochorismatase family protein                  | 100 | 6.02e-168 | 61 | 2.19e-97  | 0 | - |
| ORF26 | 383 | 43.14 | Isochorismate synthase                          | 99  | 0.0       | 46 | 4.77e-113 | 0 | - |
| ORF27 | 119 | 40.28 | Hypothetical protein                            | 0   | -         | 0  | -         | 0 | - |
