# Supplementary material for: First Genome Description of Providencia vermicola Isolate Bearing NDM-1 from Blood Culture
Source: MDPI journal article supplement (doi:10.3390/microorganisms9081751), 2021-08-17
Supplement: s1 [file s1]

**Supplementary Table S2:** Virulence factor genes identified in *Providencia vermicola* P8538 isolate.

| Gene             | Description                                                    | Best Blast Hit                                 | Identity (%) | Coverage (%) | Accession Number |
|------------------|----------------------------------------------------------------|------------------------------------------------|--------------|--------------|------------------|
| <i>hcp/tssD</i>  | Type VI secretion system protein, Hcp family                   | <i>Klebsiella pneumoniae</i> HS11286           | 77.24        | 100          | YP_005226602.1   |
| <i>gnd</i>       | 6-phosphogluconate dehydrogenase                               | <i>Klebsiella pneumoniae</i> NTUH-K2044        | 76.17        | 100          | YP_002920353.1   |
| <i>acrB</i>      | Acriflavine resistance protein B                               | <i>Klebsiella pneumoniae</i> NTUH-K2044        | 70.49        | 99.34        | YP_002918165.1   |
| <i>kdsA</i>      | 2-dehydro-3-deoxyphosphooctonate aldolase                      | <i>Haemophilus influenzae</i> Rd KW20          | 74.82        | 98.83        | NP_439706        |
| <i>rfaD</i>      | ADP-L-glycero-D-mannoheptose-6-epimerase                       | <i>Haemophilus influenzae</i> Rd KW20          | 72.58        | 98.83        | NP_439271        |
| <i>htpB</i>      | Hsp60, 60K heat shock protein Htpb                             | <i>Legionella pneumophila</i> 1                | 73.95        | 98.72        | YP_094724        |
| <i>fliG</i>      | Flagellar motor switch protein G                               | <i>Yersinia enterocolitica</i> 8081            | 71.46        | 98.59        | YP_001006742     |
| <i>cheY</i>      | Chemotaxis regulatory protein Chey                             | <i>Yersinia enterocolitica</i> 8081            | 75.78        | 97.46        | YP_001006774     |
| <i>vipB/tssC</i> | Type VI secretion system contractile sheath large subunit Vipb | <i>Klebsiella pneumoniae</i> HS11286           | 70.59        | 95.45        | YP_005226598.1   |
| <i>lpxC</i>      | UDP-3-O-(R-3-hydroxymyristoyl)-N-acetylglucosamine deacetylase | <i>Haemophilus influenzae</i> Rd KW20          | 73.91        | 94.99        | NP_439302        |
| <i>rcsB</i>      | Transcriptional regulator Rcsb                                 | <i>Klebsiella pneumoniae</i> NTUH-K2044        | 73.53        | 94.01        | YP_002920501.1   |
| <i>flhC</i>      | Flagellar biosynthesis transcription activator Flhc            | <i>Yersinia enterocolitica</i> 8081            | 75           | 90.82        | YP_001006783     |
| <i>fliM</i>      | Flagellar motor switch protein Flim                            | <i>Yersinia enterocolitica</i> 8081            | 70.08        | 87.8         | YP_001006748     |
| <i>fliQ</i>      | Flagellar biosynthetic protein Fliq                            | <i>Yersinia enterocolitica</i> 8081            | 71.37        | 86.3         | YP_001006752     |
| <i>fliI</i>      | Flagellum-specific ATP synthase Flii                           | <i>Yersinia enterocolitica</i> 8081            | 71.92        | 84.65        | YP_001006744     |
| <i>flgG</i>      | Flagellar basal-body rod protein Flgg                          | <i>Yersinia enterocolitica</i> 8081            | 71.08        | 83.52        | YP_001006759     |
| <i>cheW</i>      | Purine-binding chemotaxis protein Chew                         | <i>Yersinia enterocolitica</i> 8081            | 71.01        | 82.53        | YP_001006779     |
| <i>luxS</i>      | S-ribosylhomocysteinase                                        | <i>Vibrio cholerae</i> O1 biovar El Tor N16961 | 72.42        | 80.62        | NP_230208        |
| <i>flhA</i>      | Flagellar biosynthesis protein Flha                            | <i>Yersinia enterocolitica</i> 8081            | 71.02        | 73.82        | YP_001006770     |
| <i>gmhA/lpcA</i> | Phosphoheptose isomerase                                       | <i>Haemophilus influenzae</i> Rd KW20          | 77.97        | 71.33        | NP_439337        |
